# Supplementary material for: Topical Losartan Decreases Myofibroblast Generation But Not Corneal Opacity After Surface Blast-Simulating Irregular PTK in Rabbits
Source: PubMed Central journal article supplement — Transl Vis Sci Technol. 2023 Sep 26;12(9):20. doi: 10.1167/tvst.12.9.20 (PMC10541722; doi:10.1167/tvst.12.9.20), 2023-09-26

### Supplemental Figure legend

Slit lamp photograph of a cornea (cornea #2 in the losartan treated group) at four weeks after irregular PTK without topical fluorescein (A) and with topical fluorescein (B), but the epithelium in this cornea was subsequently healed at the six-week time point (C). Thus, the epithelial defect was present in this cornea between two weeks and six weeks after injury, but the precise duration is unknown. Note there was an increase in opacity at the site of the prior epithelial defect by six weeks compared to four weeks. It is possible continued topical losartan treatment beyond the six weeks prior to planned euthanasia would have further decreased the stromal myofibroblasts and overall opacity in this cornea. However, for the purposes of this study, this cornea was considered an outlier in the topical losartan group, which is reinforced by the results shown in Fig. 2B and Fig. 3B.

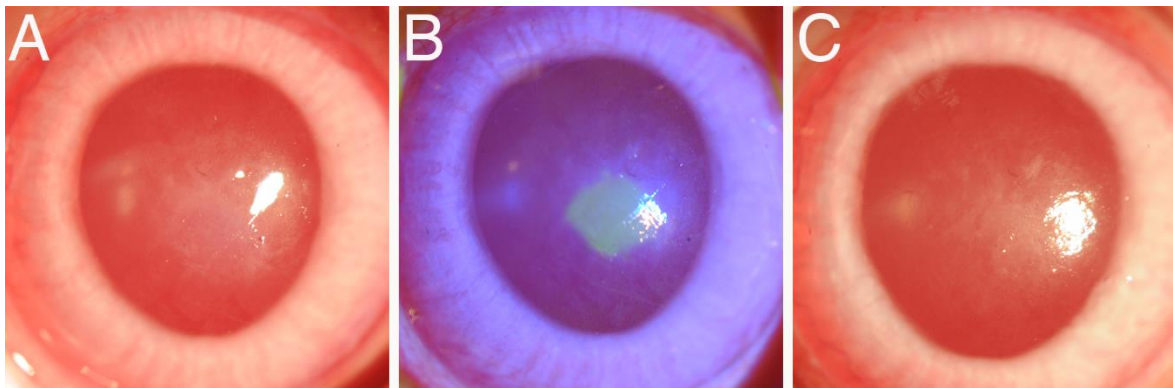

Supplement: tvst-12-9-20_s001.pdf [file tvst-12-9-20_s001.pdf]
